# Supplementary material for: Effect of zeolite morphology on charge separated states: ZSM-5-type nanocrystals, nanosheets and nanosponges
Source: Royal Society of Chemistry journal article supplement (doi:10.1039/d0cp01701a), 2020-01-01
Supplement: d0cp01701a1.pdf [file d0cp01701a1.pdf]

## - Supplementary Information -

### Effect of zeolite morphology on separated charge states: ZSM-5-type nanocrystals, nanosheets and nanosponges

Lucie Duploux<sup>a</sup>, Alain Moissette<sup>a,\*</sup>, Matthieu Hureau<sup>a</sup>, Vincent De Waele<sup>a</sup>, T. Jean Daou<sup>b,c</sup>,  
Isabelle Batonneau-Gener<sup>d</sup>

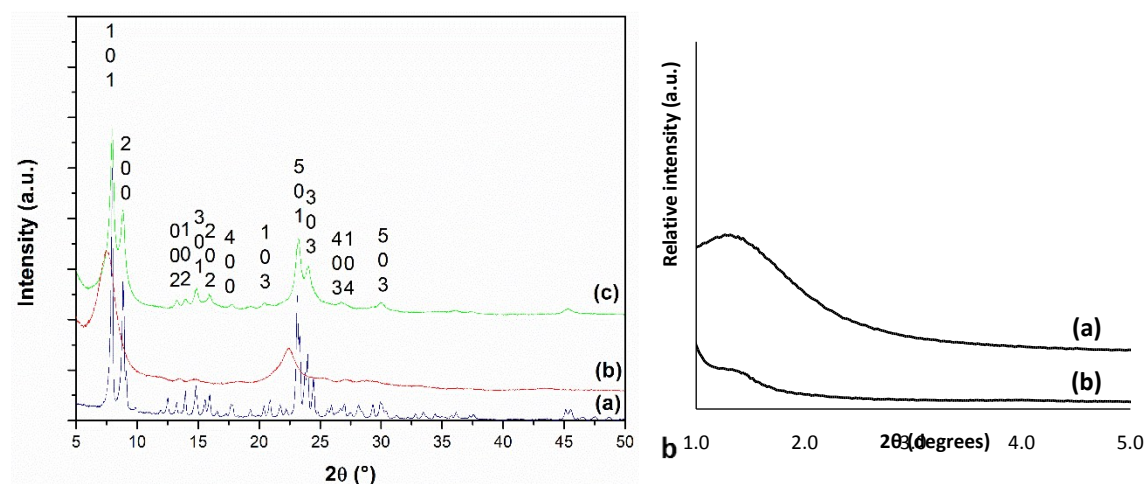

**Figure S1** : Wide angle XRD patterns (left) obtained for the calcined samples: nanocrystals (a), nanosheets (b) and nanosponges (c). Low angle XRD patterns (right) of the as synthesized materials: nanosheets (a) and nanosponges (b).

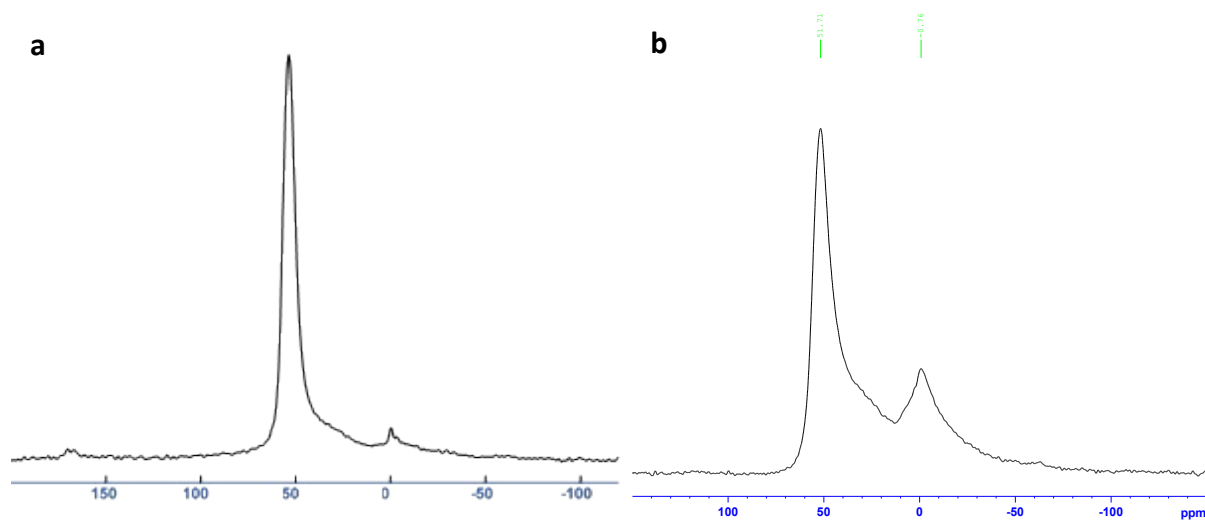

**Figure S2 :**  $^{27}\text{Al}$  MAS NMR spectra of (a) nanosheets and (b) nanosponges. Peak at 0 ppm is attributed to Al extraframework species and peak around 60 ppm is attributed to the Al species in the zeolite framework.

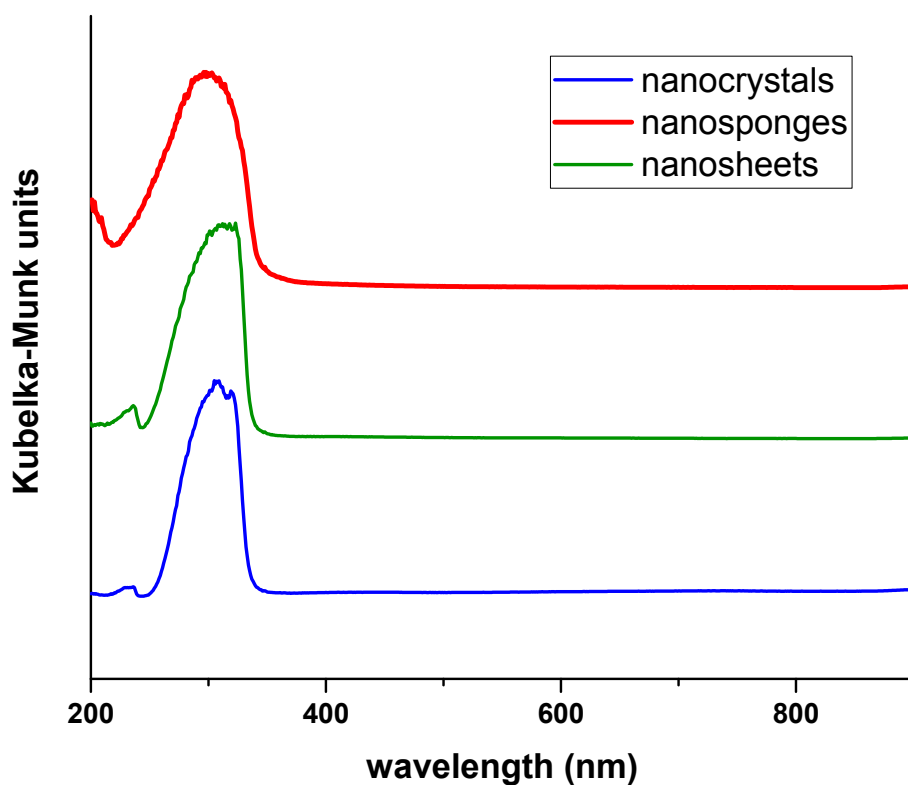

**Figure S3 :** Diffuse reflectance UV-visible spectra obtained after t-stilbene adsorption in nanocrystals, nanosheets and nanosponges
